# Supplementary material for: On the mechanism of photocatalytic reactions on CuxO@TiO2 core–shell photocatalysts
Source: Royal Society of Chemistry journal article supplement (doi:10.1039/d0ta12472a), 2021-01-01
Supplement: d0ta12472a1.pdf [file d0ta12472a1.pdf]

## Electronic Supplementary Information (ESI)

for

### On the mechanism of photocatalytic reactions on $\text{Cu}_x\text{O}@\text{TiO}_2$ core-shell photocatalyst

by

Kunlei Wang, Zuzanna Bielan, Maya Endo-Kimura, Marcin Janczarek, Dong Zhang, Damian Kowalski, Anna Zielińska-Jurek, Agata Markowska-Szczupak, Bunsho Ohtani and Ewa Kowalska\*

#### 1. STEM observations of $\text{Cu}_x\text{O}@\text{TiO}_2$ samples prepared by microemulsion method

STEM images for  $\text{Cu}_x\text{O}@\text{TiO}_2$  samples containing 2%, 5% and 50% of  $\text{Cu}_x\text{O}$  are shown in Figures S1, S2 and S3, respectively. It is clear that in the case of 50 wt%  $\text{Cu}_x\text{O}@\text{TiO}_2$  sample, cuprous oxide was only partly covered with  $\text{TiO}_2$ .

Distributions of: size of aggregated titania (bare  $\text{TiO}_2$  forming aggregates in all samples), size of  $\text{Cu}_x\text{O}$  core and thickness of titania shell after counting of 55-120 particles are shown in Fig. S4.

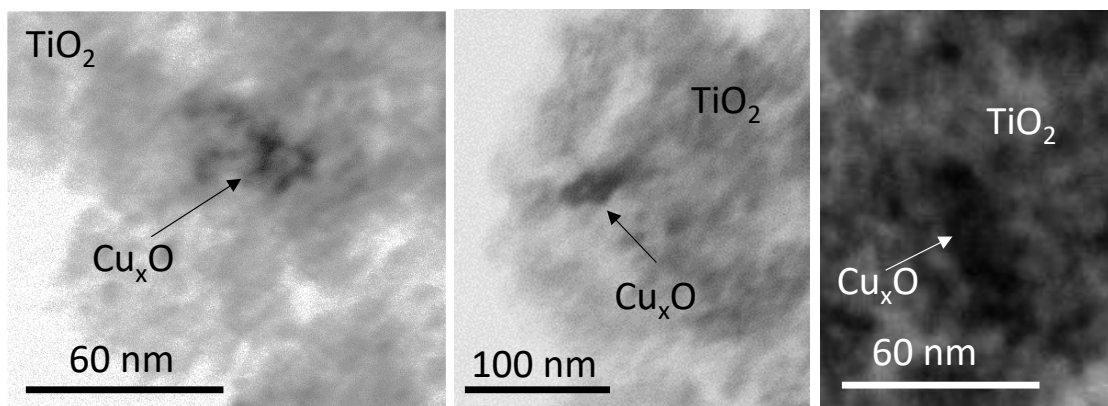

Fig. S1 STEM images of 2%  $\text{Cu}_x\text{O}@\text{TiO}_2$  sample.

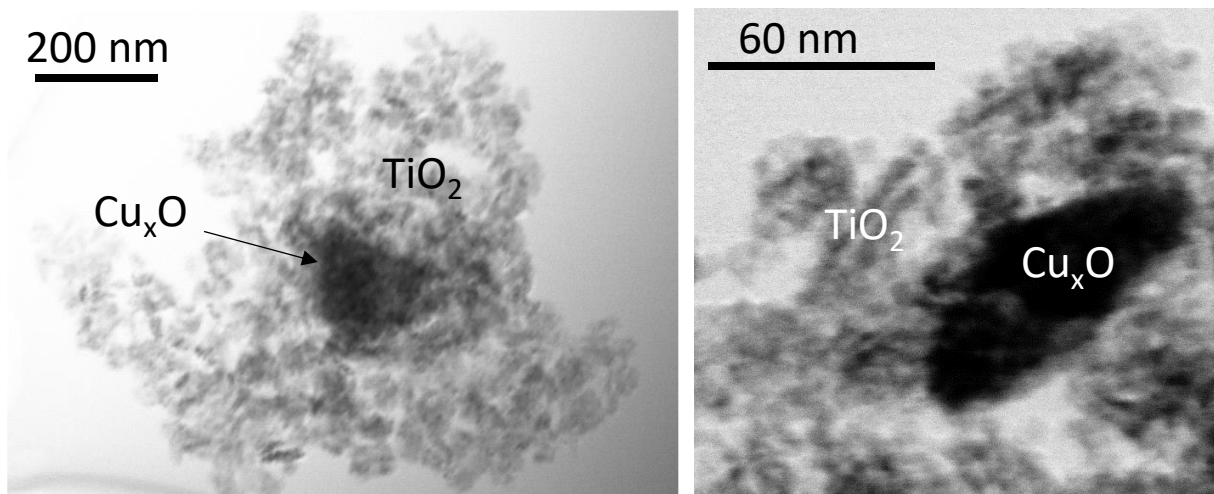

Fig. S2 STEM images of 5%  $\text{Cu}_x\text{O}@TiO_2$  sample.

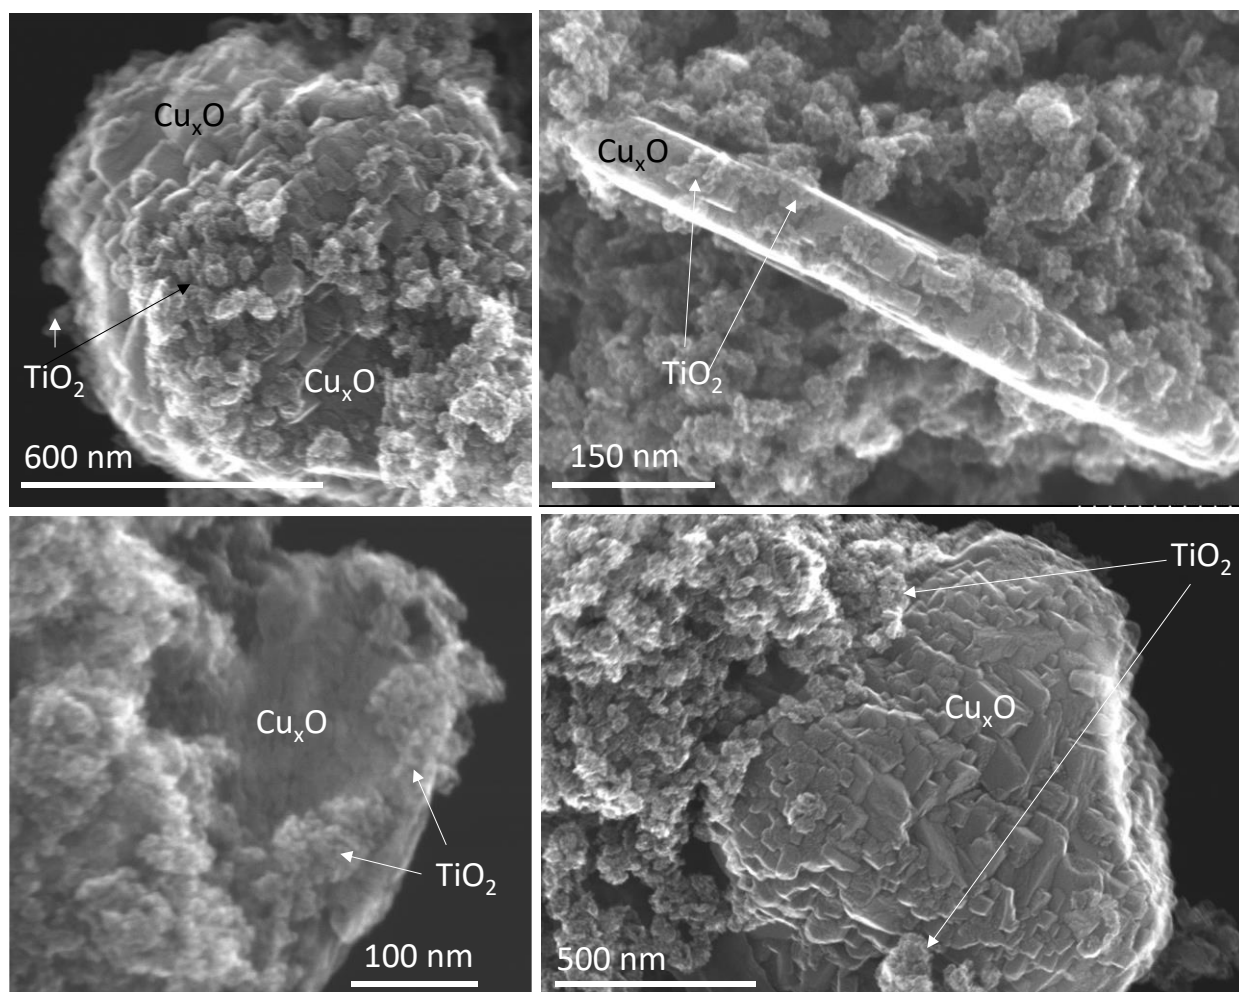

Fig. S3 SEM images of 50%  $\text{Cu}_x\text{O}@TiO_2$  sample.

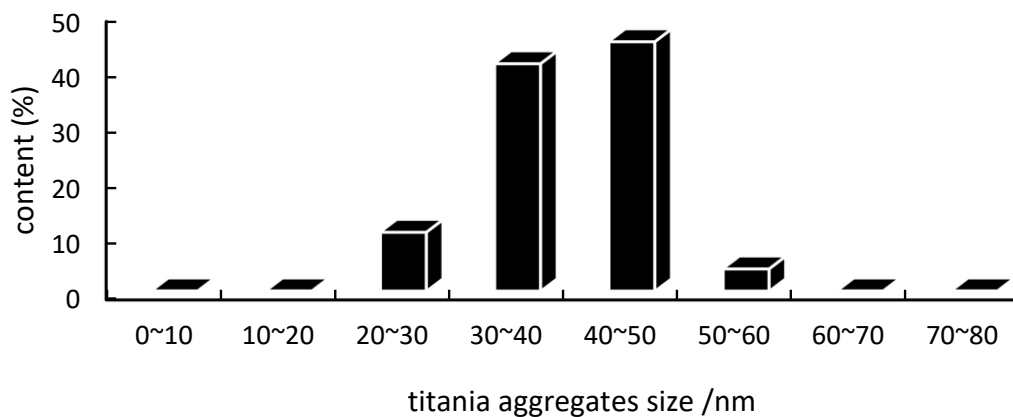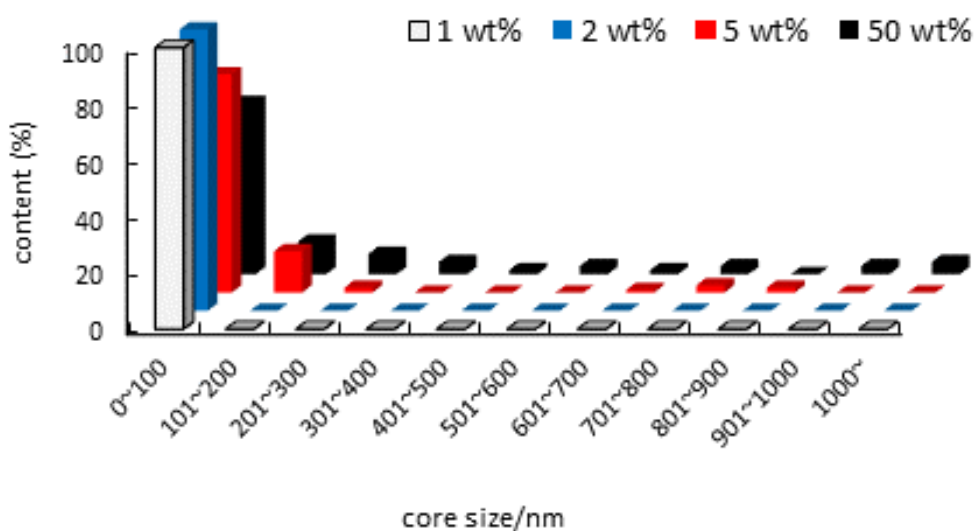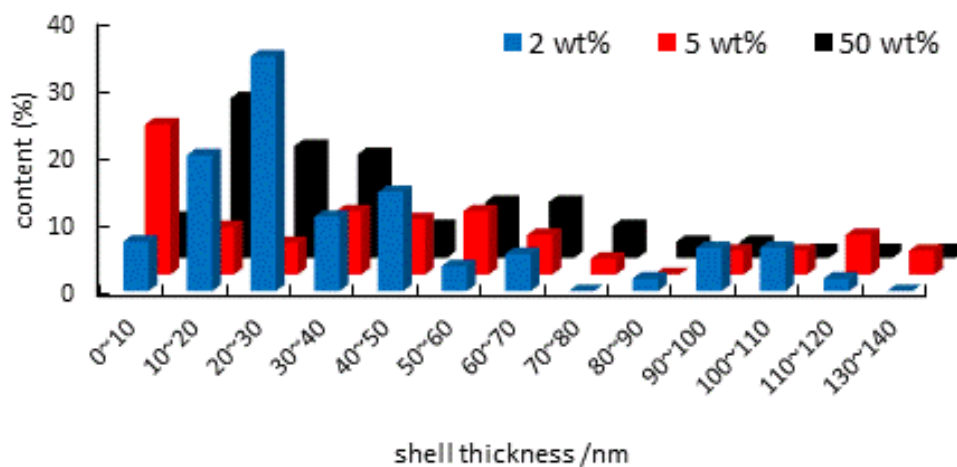

Fig. S4 Distributions of: (top) size of titania aggregates in all samples (as bare TiO<sub>2</sub>), (center) Cu<sub>x</sub>O core size, and (bottom) titania shell thickness in Cu<sub>x</sub>O@TiO<sub>2</sub> samples (For 50% Cu<sub>x</sub>O@TiO<sub>2</sub> sample, there is no “shell” since the core (Cu<sub>x</sub>O/Cu<sub>2</sub>O) was not completely covered with titania.).

## 2. Photocatalytic activity tests in the presence of scavengers

Oxidative decomposition of acetic acid for 5% Cu<sub>x</sub>O@TiO<sub>2</sub> sample was performed also in the presence of different scavengers, i.e., Cr(VI), isopropanol, KI and TEMPOL (4-hydroxy-2,2,6,6-tetramethylpiperidin 1-oxyl) to check the participation of different species in the decomposition of acetic acid, i.e., photogenerated electrons (e<sup>-</sup>), hydroxyl radicals (OH<sup>•</sup>), holes (h<sup>+</sup>) and superoxide radical anions (O<sub>2</sub><sup>•-</sup>), respectively. Prior to irradiation, 0.5 mL of respective scavenger was added to the testing tube, i.e., 0.01 K<sub>2</sub>CrO<sub>4</sub>, 25 mM isopropanol, 0.25 mM KI and 1 mM TEMPOL. The obtained data are shown in **Fig. S5**.

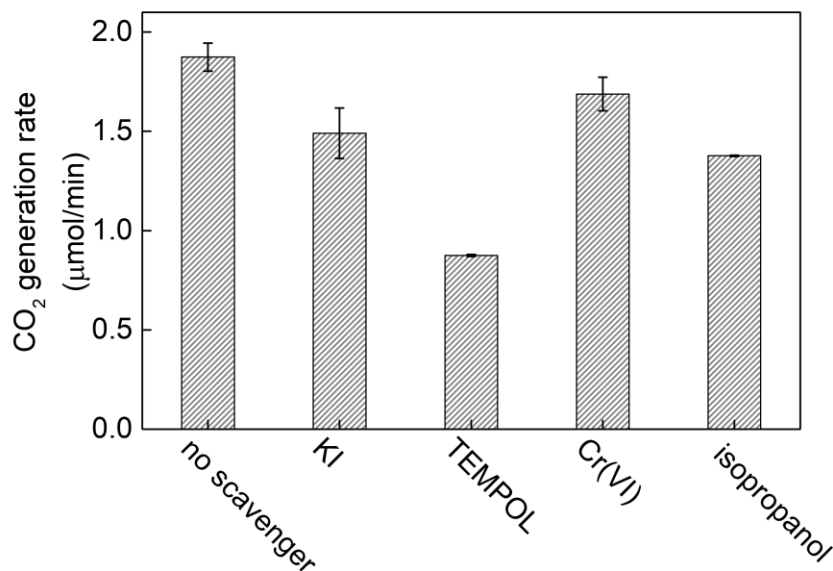

Fig. S5 Photocatalytic activity of 5 wt% Cu<sub>x</sub>O@TiO<sub>2</sub> sample for oxidative decomposition of acetic acid under UV/vis irradiation in the absence (“no scavenger”) and the presence of various scavengers, i.e., Cr(VI), isopropanol, KI and TEMPOL.
